# Supplementary material
Source: publisher figshare collection journal article supplement (https://karger.figshare.com/ndownloader/files/14606015)
Supplement: Supplementary file 1 [file 14606015]

**Supplementary Table 7.** Characteristics of neuron profiles in the interstitial nucleus.

| PARAMETER | ANTIBODY | |
| --- | --- | --- |
| Area (µm2) | PV | GAD |
| Number | 28 | 7 |
| Mean | 115.28 | 138.81 |
| Standard deviation | 58.11 | 43.26 |
| Range | 39.65-262.36 | 92.92-211.08 |
| Perimeter (µm) |  |  |
| Number | 28 | 7 |
| Mean | 43.77 | 46.02 |
| Standard deviation | 10.91 | 6.64 |
| Range | 26.81-69.56 | 38.98-57.52 |
| Length (µm) |  |  |
| Number | 28 | 7 |
| Mean | 16.55 | 15.91 |
| Standard Deviation | 4.82 | 2.67 |
| Range | 9.26-28.79 | 13.40-21.29 |
| Width (µm) |  |  |
| Number | 28 | 7 |
| Mean | 8.60 | 11.67 |
| Standard deviation | 2.26 | 2.53 |
| Range | 5.15-12.84 | 8.44-14.88 |
| Eccentricity (Width/Length) |  |  |
| Number | 28 | 7 |
| Mean | 0.54 | 0.75 |
| Standard deviation | 0.11 | 0.17 |
| Range | 0.35-0.74 | 0.52-0.96 |
